# Supplementary material for: A facile method for scalable synthesis of ultrathin g-C3N4 nanosheets for efficient hydrogen production
Source: Royal Society of Chemistry journal article supplement (doi:10.1039/c8ta06726k), 2018-01-01
Supplement: c8ta06726k1.pdf [file c8ta06726k1.pdf]

## Electronic Supplementary Information

### **A Facile Method for Scalable Synthesis of Ultrathin g-C<sub>3</sub>N<sub>4</sub> Nanosheets for Efficient Hydrogen Production**

Jian-Hua Zhang,<sup>a</sup> Ya-Jun Hou,<sup>a</sup> Su-Juan Wang,<sup>a</sup> Xunjin Zhu,<sup>b</sup> Cheng-Yi Zhu,<sup>a</sup> Zheng Wang,<sup>a</sup> Chao-Jie Li,<sup>a</sup> Ji-Jun Jiang,<sup>a</sup> Hai-Ping Wang,<sup>a</sup> Mei-Pan,<sup>\*a</sup> and Cheng-Yong Su<sup>a</sup>

<sup>a</sup>MOE Laboratory of Bioinorganic and Synthetic Chemistry, Lehn Institute of Functional Materials, School of Chemistry, Sun Yat-Sen University, Guangzhou 510275, China

<sup>b</sup>Department of Chemistry, Hong Kong Baptist University, Waterloo Road, Kowloon Tong, Hong Kong, China

\*Email - panm@mail.sysu.edu.cn

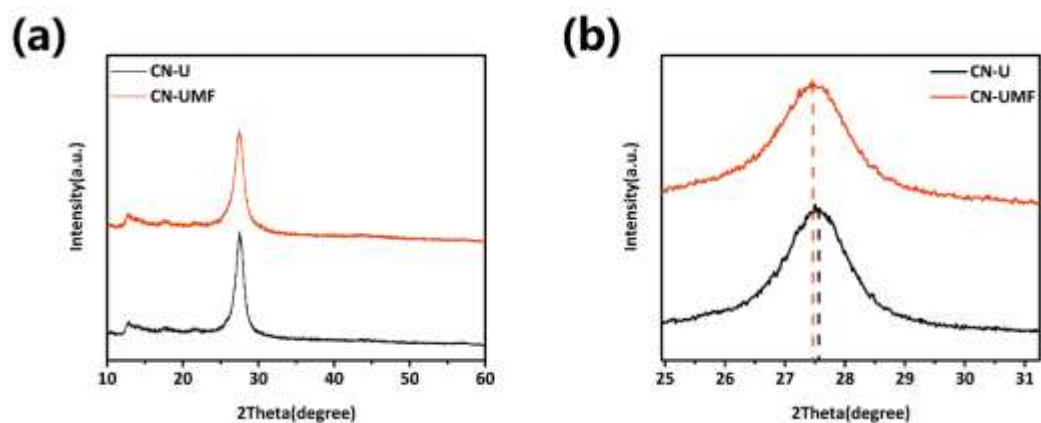

**Fig. S1** a) XRD patterns, and b) enlarged view of (002) peak for as-prepared CN-U and CN-UMF samples.

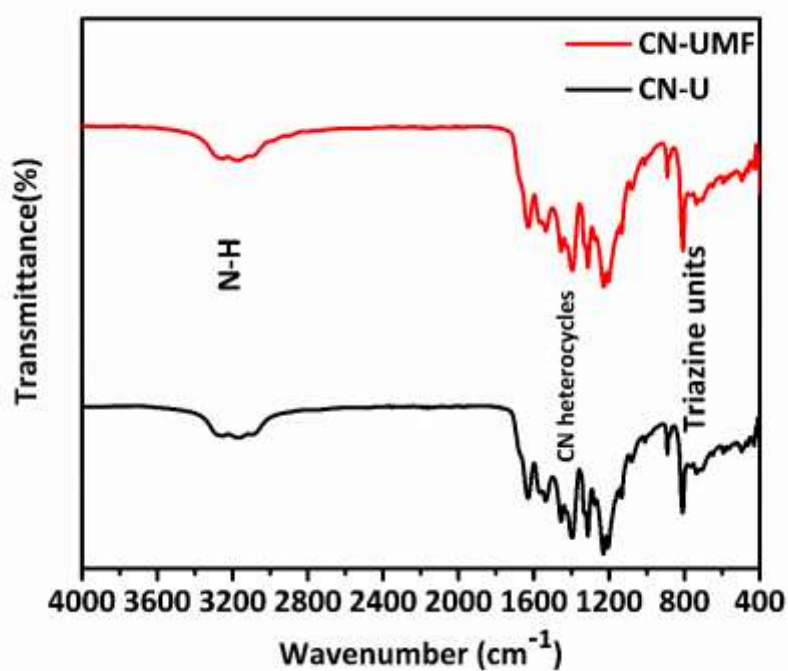

**Fig. S2** FT-IR spectra of CN-UMF and CN-U.

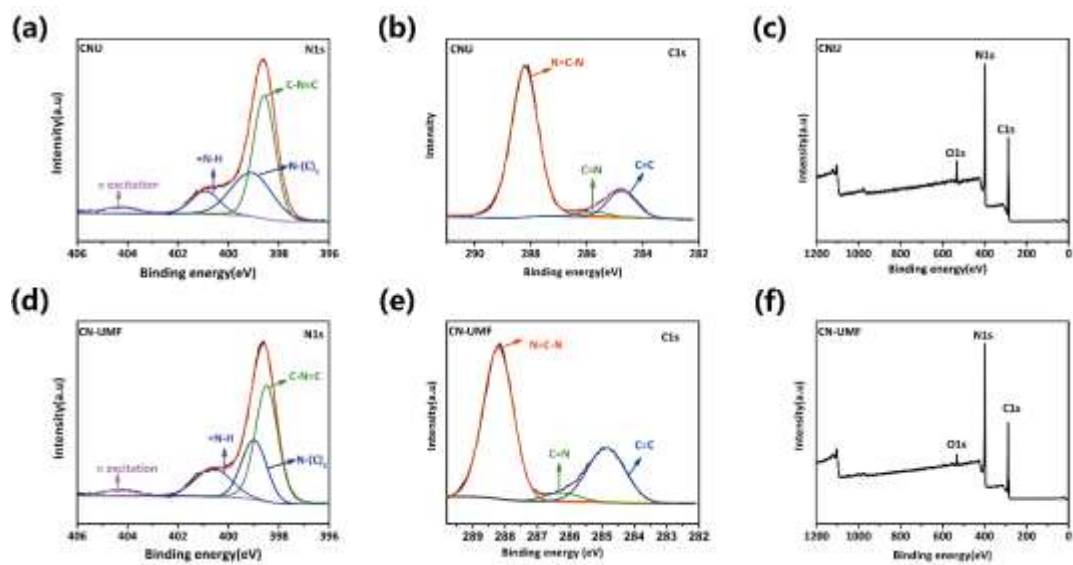

**Fig. S3** High-resolution N1s, C1s and survey XPS spectra of CN-U (a, b, c), and CN-UMF (d, e, f).

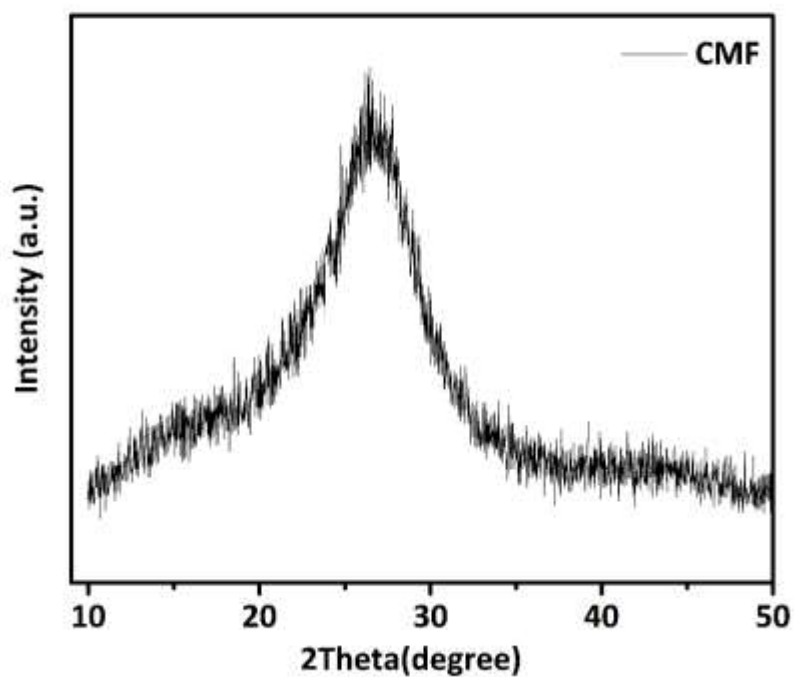

**Fig. S4** XRD patterns of the carbonized foam (CMF).

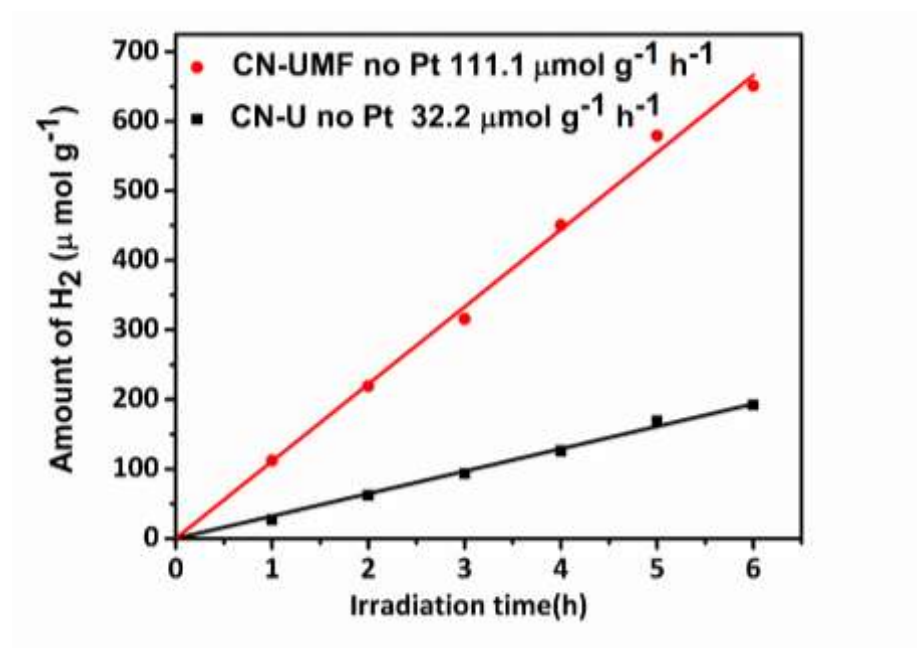

**Fig. S5** Photocatalytic H<sub>2</sub> production activity of CN-UMF and CN-U with the absence of Pt.

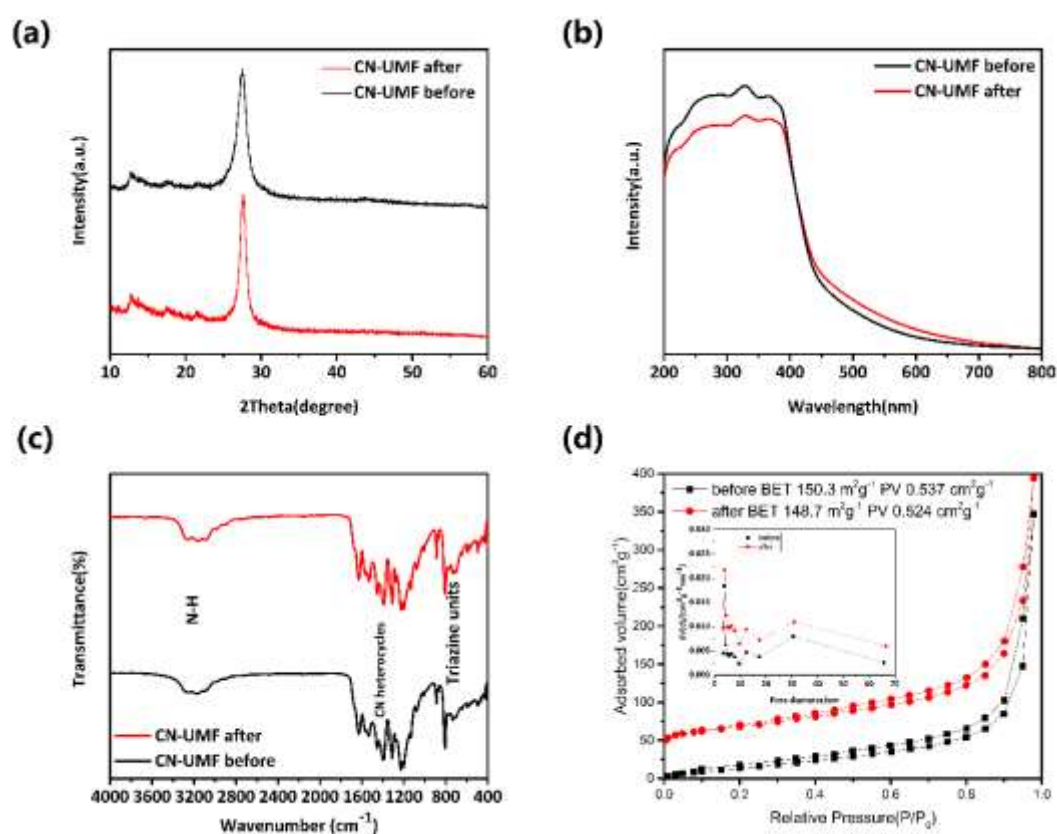

**Fig. S6** a) XRD, b) DRS, c) FT-IR spectra, and d) N<sub>2</sub> adsorption of CN-UMF before and after photocatalytic reaction.

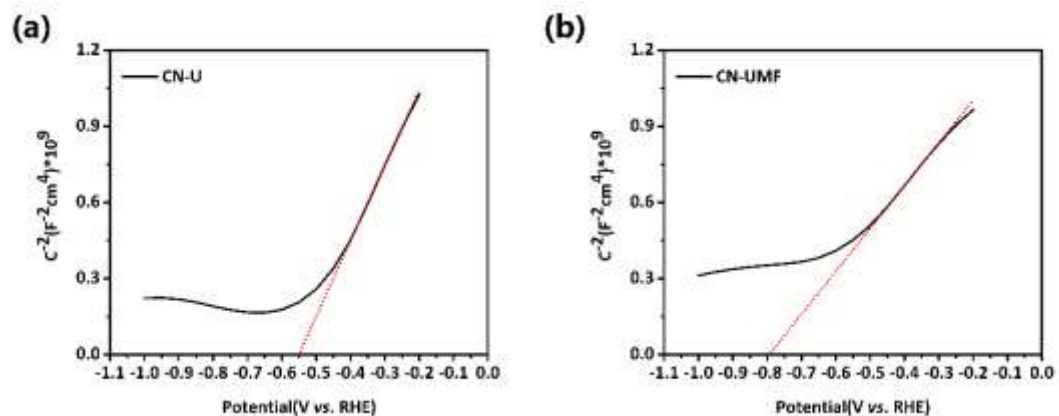

Fig. S7 Mott-Schottky plots of a) CN-U, and b) CN-UMF.

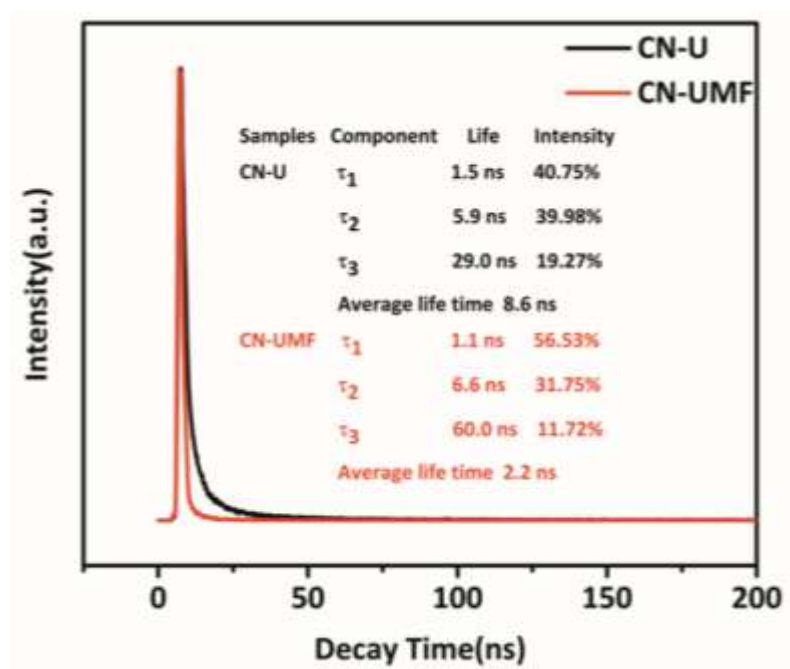

Fig. S8 Detailed decay lifetime analyses of CN-U and CN-UMF.

Table S1 The wavelength-dependent AQEs of CN-UMF.

| Wavelength/nm | 420  | 500  | 550   | 600   | 650   |
|---------------|------|------|-------|-------|-------|
| AQE           | 4.8% | 1.4% | 0.25% | 0.17% | 0.03% |

### The “solar-to-hydrogen” conversion efficiency (STH)

We also evaluated the solar energy conversion by using AM 1.5G solar simulator as the light source with CN-UMF as the catalyst. The irradiated light intensity was controlled to be 20 mW cm<sup>-2</sup> and the irradiation area was controlled to be 19.625 cm<sup>2</sup>. After 1 h of illumination, the total incident power over the 19.625 cm<sup>2</sup> irradiation area was 0.3925 W, so that the total input energy in 1 hour was:

$$E_{solar} = 0.3925 \text{ W} \times 1 \times 3600 \text{ s} = 1413 \text{ J}$$

During the photocatalytic reaction, 79 μmol H<sub>2</sub> was detected, which indicated that the energy generated by water splitting is:

$$E_F = 79 \times 10^{-6} \times 6.02 \times 10^{23} \times 2.46 \times 1.609 \times 10^{-19} = 19 \text{ J}$$

2.46 eV is the free energy of water splitting.

The “solar-to-hydrogen” conversion efficiency (STH) of CN-UMF was determined to be:

$$STH = \frac{\text{Energy of generation of hydrogen by water splitting}}{\text{Solar energy irradiating the reaction cell}} = \frac{19 \text{ J}}{1413 \text{ J}} \times 100\% = 1.34\%$$
